# Supplementary material for: Knee Extensors Muscle Plasticity Over a 5-Years Rehabilitation Process After Open Knee Surgery
Source: PubMed Central journal article supplement (PMC6178139; doi:10.3389/fphys.2018.01343), 2018-09-25
Supplement: Image_1.pdf [file Image_1.pdf]

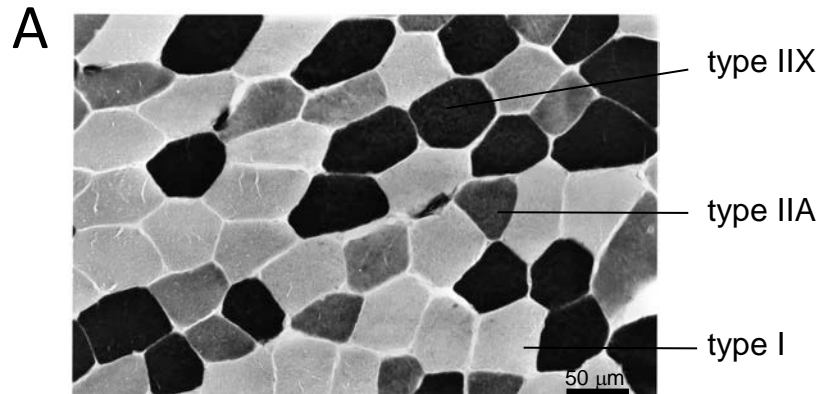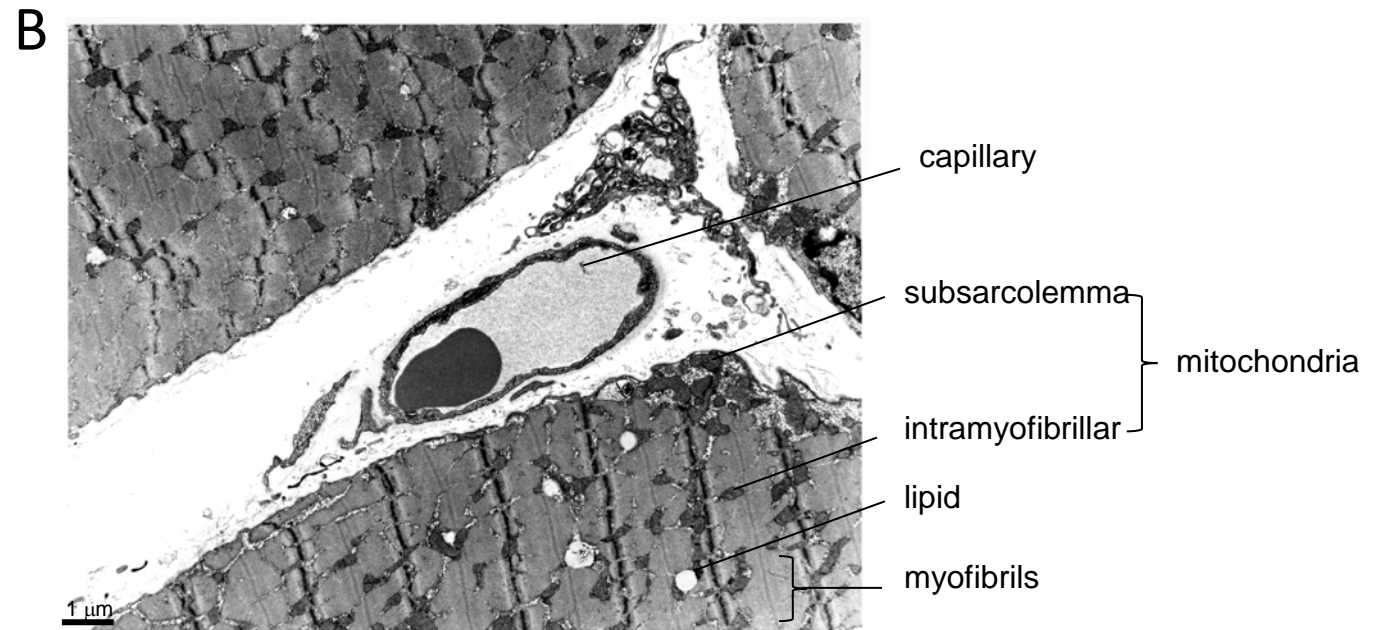

**Supplementary Figure S1:** Illustration of measured cellular parameters. A,B) Photographic record of alkali stable myofibrillar ATPase in cross-sectioned muscle fibers (A) and electron micrograph (B) from a vastus lateralis biopsy of a contralateral control. Examples of the quantified cellular and ultrastructural parameters are indicated.
