# Supplementary material for: Knee Extensors Muscle Plasticity Over a 5-Years Rehabilitation Process After Open Knee Surgery
Source: PubMed Central journal article supplement (PMC6178139; doi:10.3389/fphys.2018.01343), 2018-09-25
Supplement: Image_2.pdf [file Image_2.pdf]

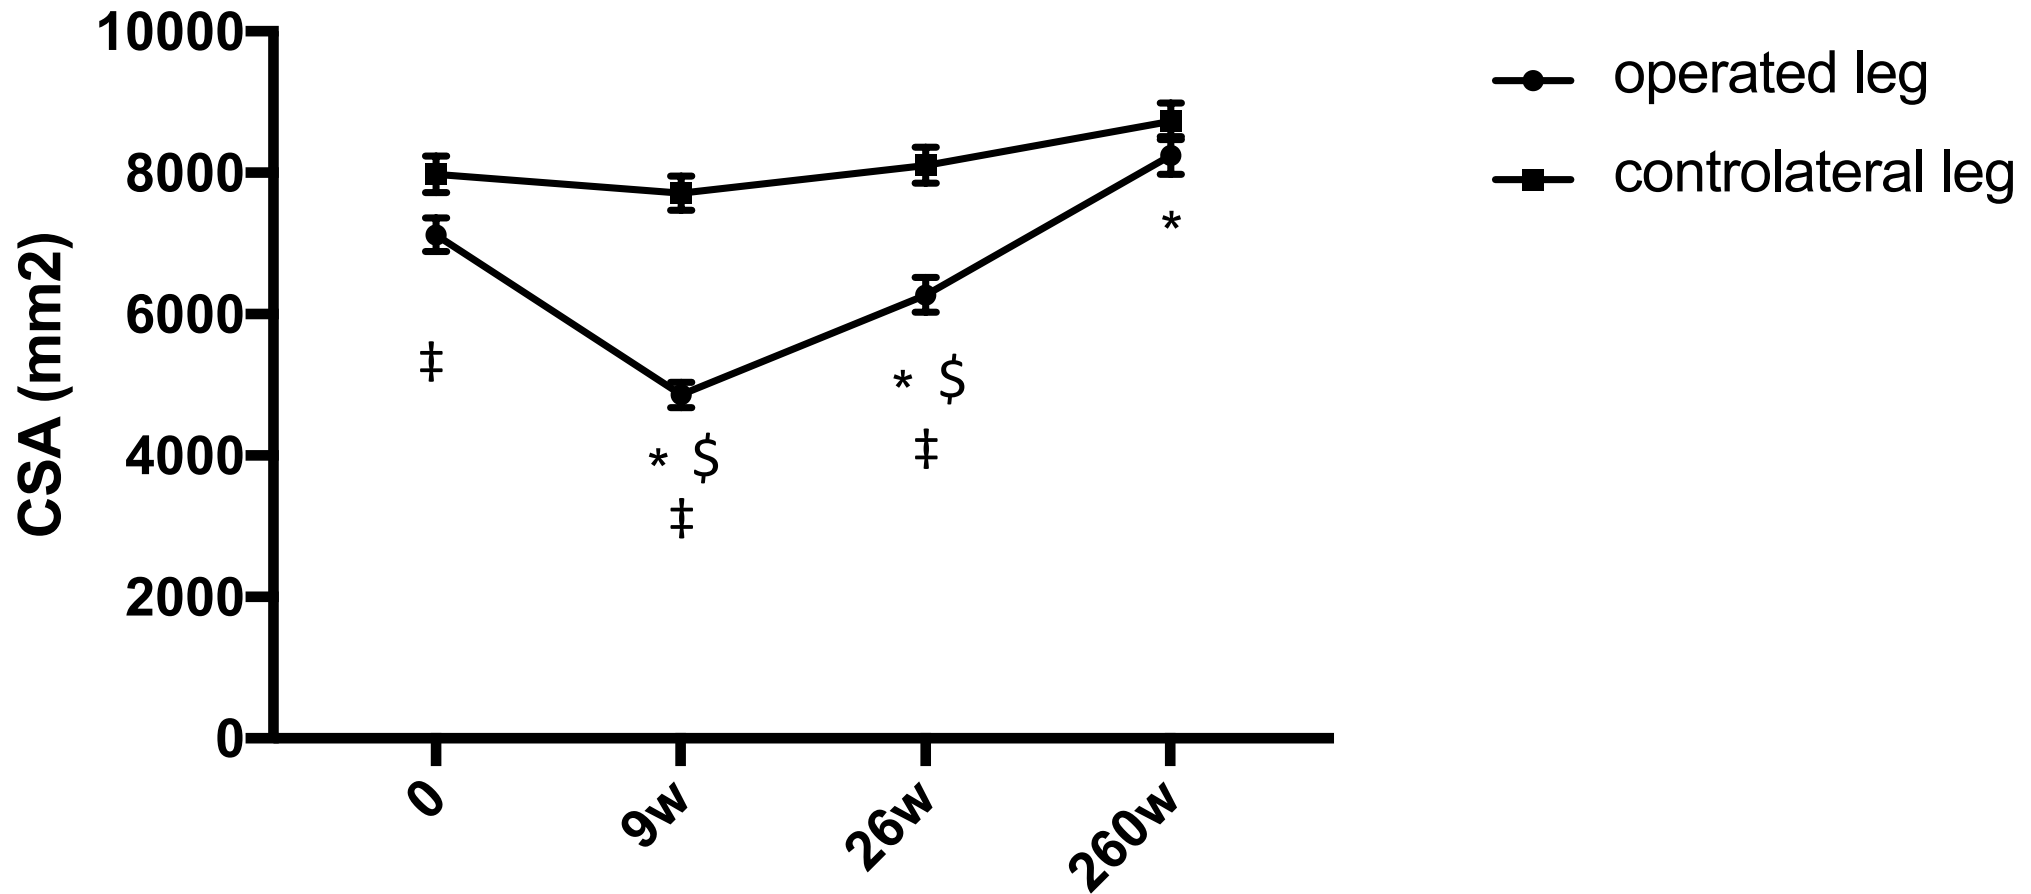

**Supplementary Figure S2:** Time line of compositional alterations in the knee extensor group. Line graph of mean  $\pm$  SE of the cross-sectional area (CSA) of the quadriceps group in the ACL insufficient and contralateral leg over time. \$,  $p < 0.05$  vs. 260w contralateral leg; \*,  $p < 0.05$  vs. 0w same leg; ‡,  $p < 0.05$  vs. same time point contralateral leg. Repeated-measures ANOVA with post-hoc test of Fisher. N=9.
