# Supplementary material for: Knee Extensors Muscle Plasticity Over a 5-Years Rehabilitation Process After Open Knee Surgery
Source: PubMed Central journal article supplement (PMC6178139; doi:10.3389/fphys.2018.01343), 2018-09-25
Supplement: Image_4.pdf [file Image_4.pdf]

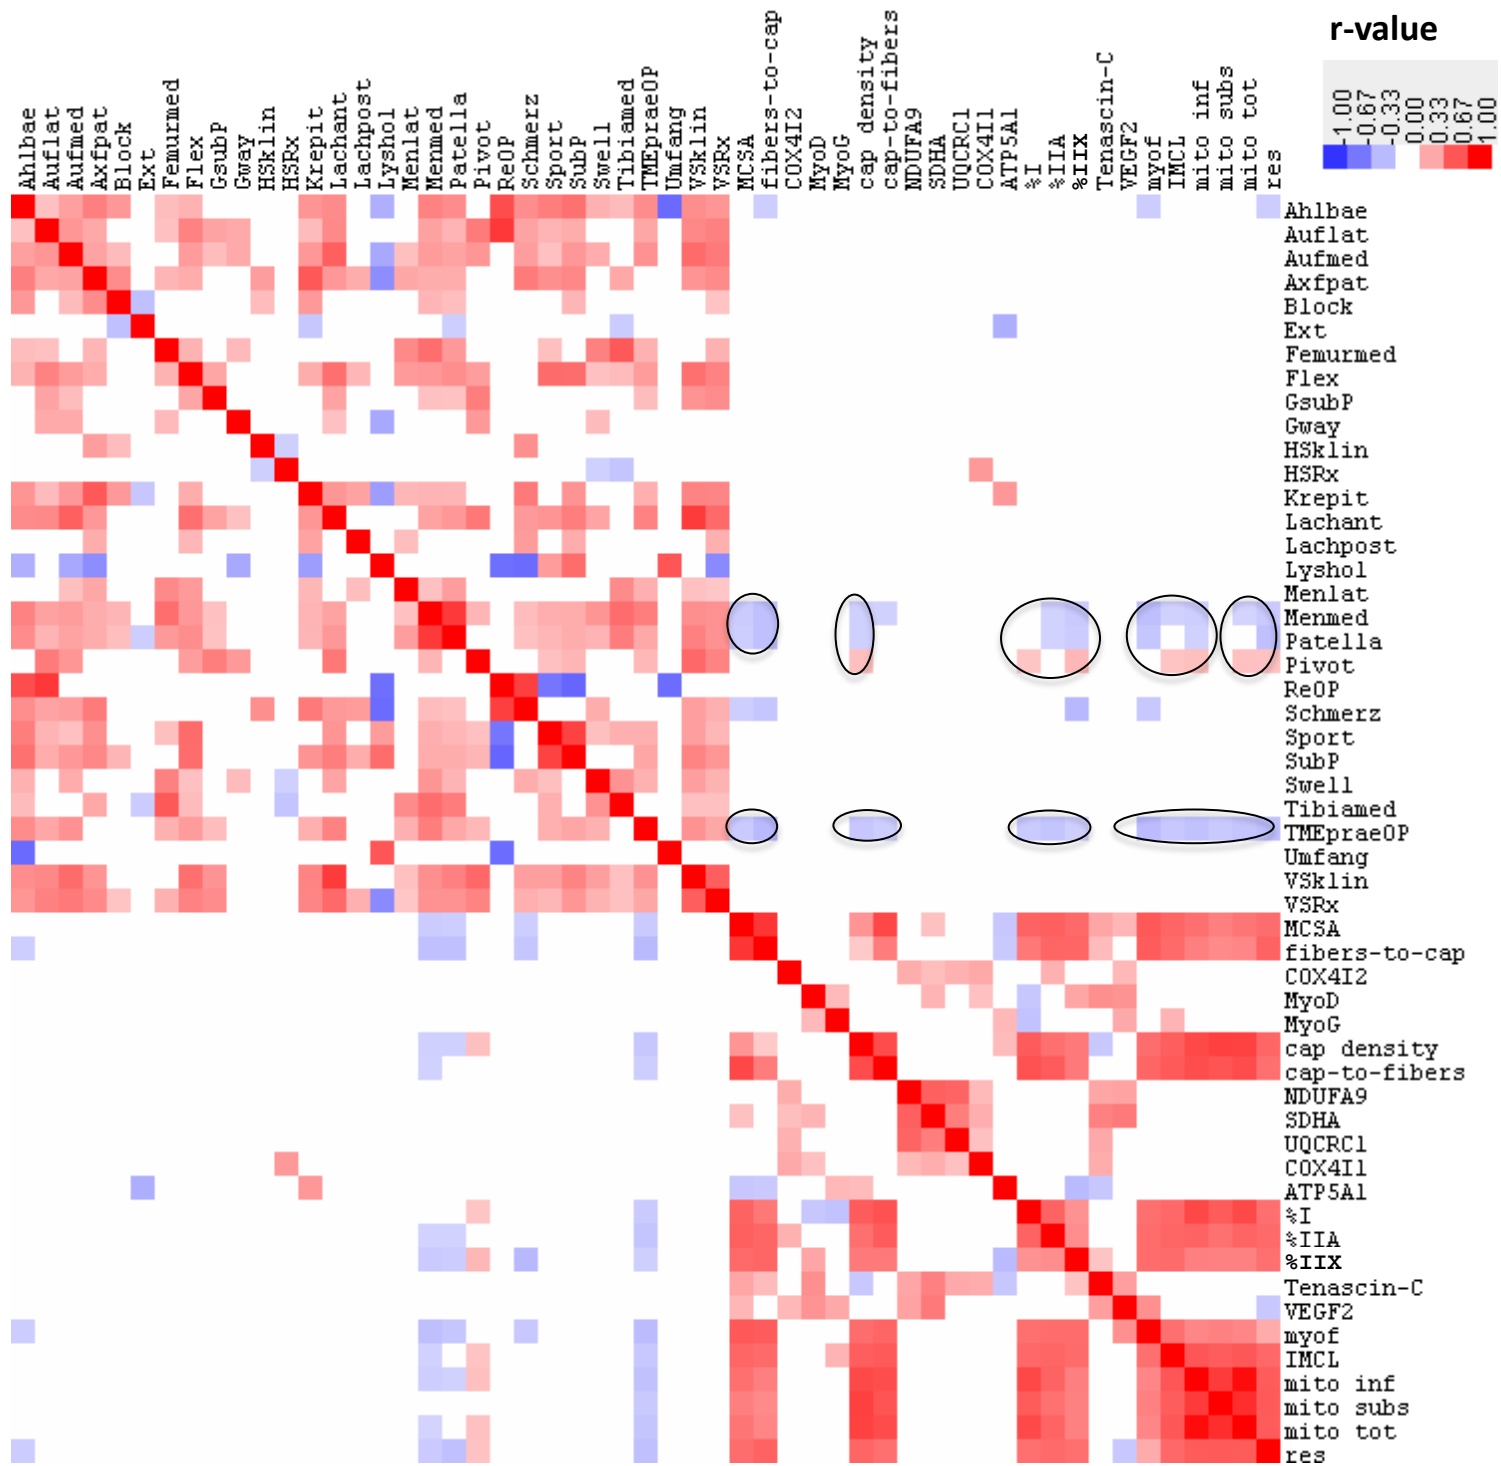

**Supplementary Figure S4:** Correlation matrix of relationships between muscle and clinical parameters. Heat map showing p-value weighed correlations between molecular and cellular parameters of *m. vastus lateralis* and clinical parameters for the ACL insufficient leg. The colour code used to visualize r-values is given. Only those relationships were shown which met a p-value  $\leq 0.05$ . Relationships of interest are circled.
